# Supplementary material for: Deep mutational scanning and machine learning reveal structural and molecular rules governing allosteric hotspots in homologous proteins
Source: eLife journal article supplement (doi:10.7554/elife.79932), 2022-10-13

- |                   |                   |                           |                        |                          |                     |                         |
|-------------------|-------------------|---------------------------|------------------------|--------------------------|---------------------|-------------------------|
| 1. MW             | 5. max Hbonds     | 9. atomic density         | 13. potential Hbonds   | 17. DBD correlation      | 21. ligand distance | 25. C3 distance         |
| 2. charge         | 6. polarity       | 10. bb entropy loss       | 14. frustration index  | 18. LBD correlation      | 22. centrality      | 26. C4 distance         |
| 3. hydrophobicity | 7. polarizability | 11. sc entropy loss       | 15. bfactor            | 19. residue correlations | 23. C1 distance     | 27. sequence separation |
| 4. aromaticity    | 8. flexibility    | 12. solvent accessibility | 16. structural entropy | 20. DNA distance         | 24. C2 distance     |                         |

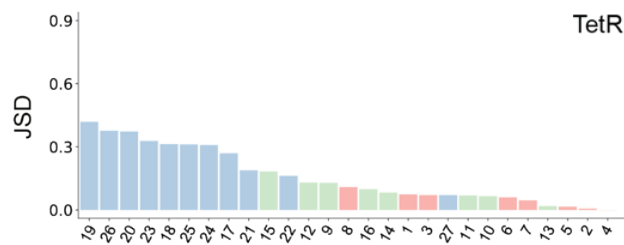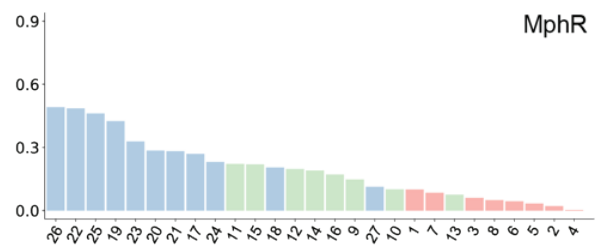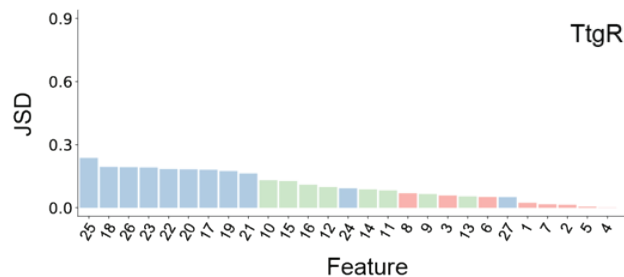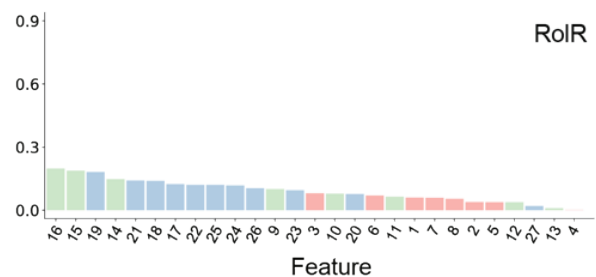

Supplement: supp [file elife-79932-supp-v1.zip]
