# Supplementary figures and images for: Deep mutational scanning and machine learning reveal structural and molecular rules governing allosteric hotspots in homologous proteins
Source: eLife journal article supplement (doi:10.7554/elife.79932), 2022-10-13

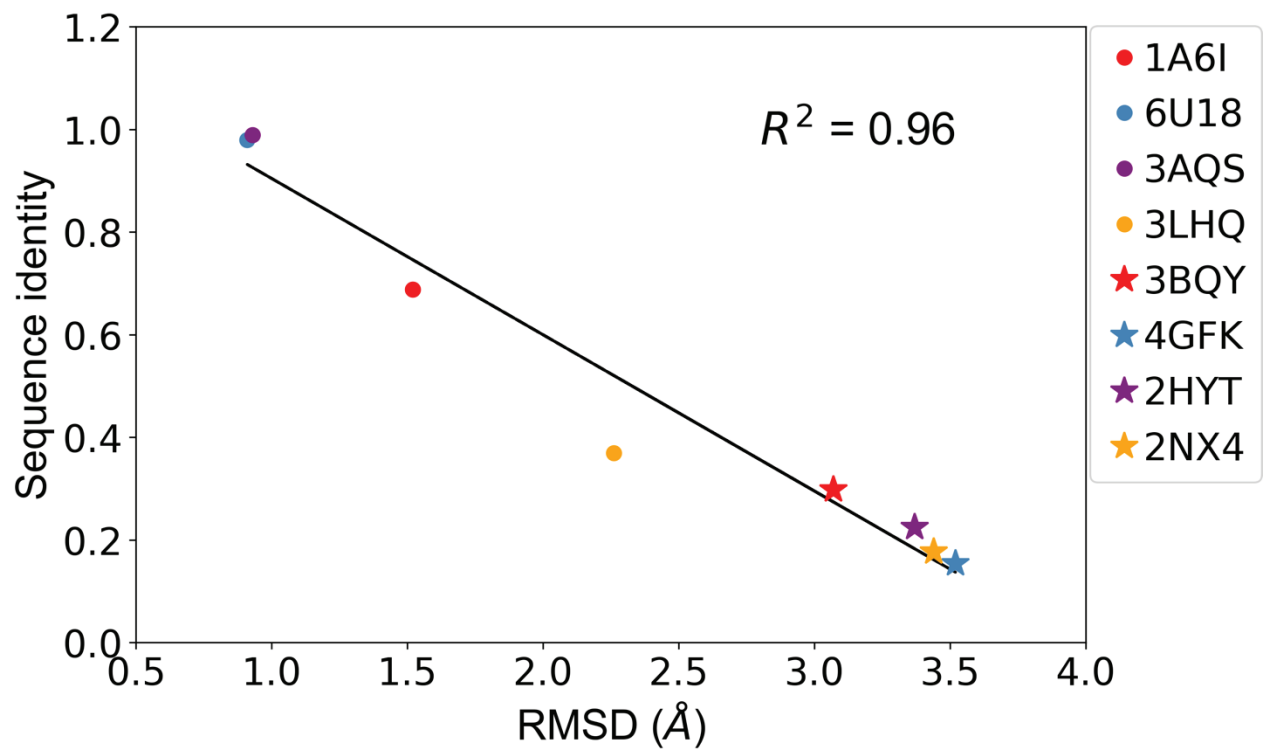

Supplement: supp [file elife-79932-supp-v1.zip]

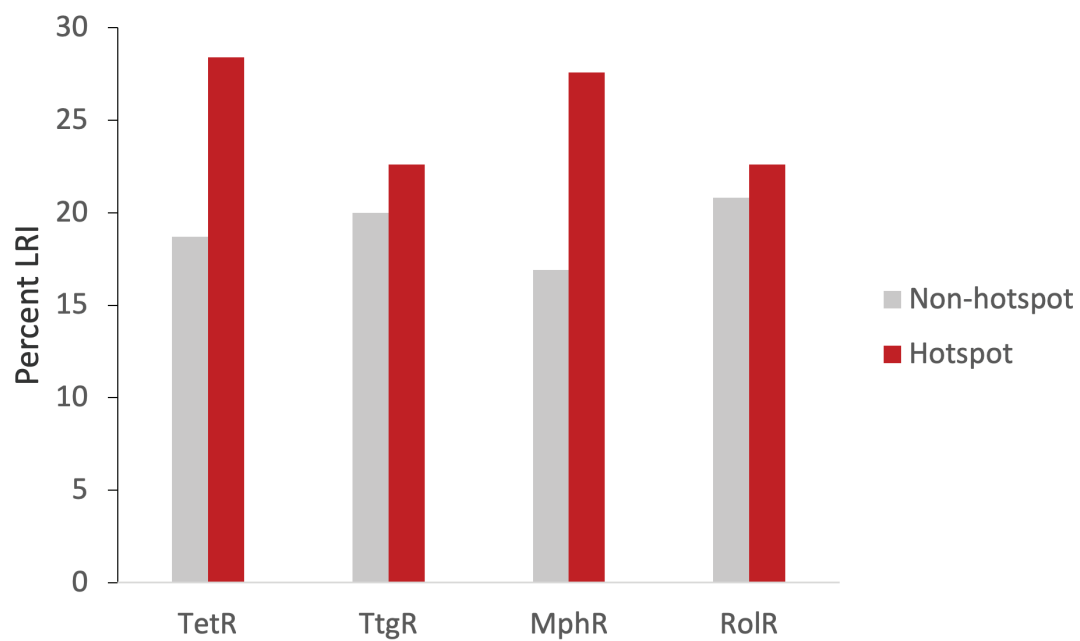

Supplement: supp [file elife-79932-supp-v1.zip]

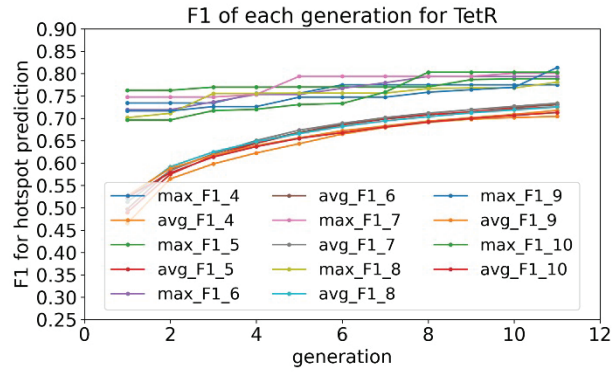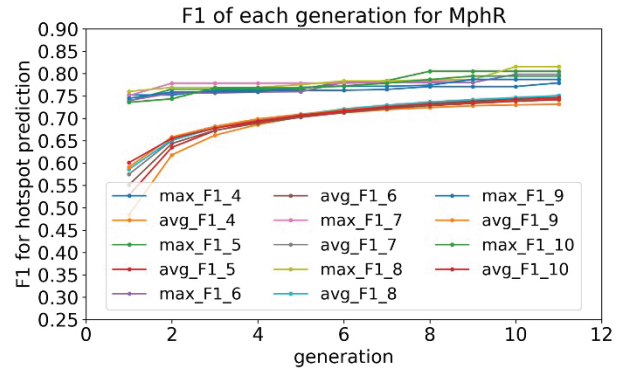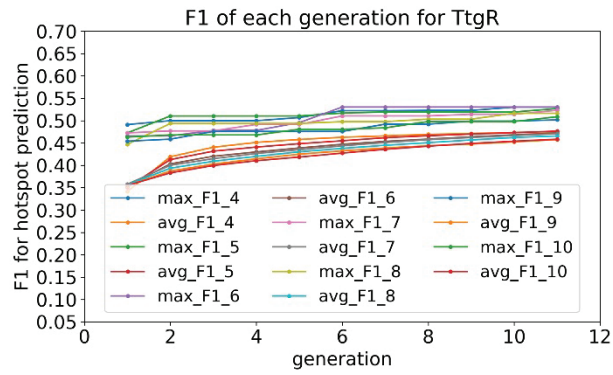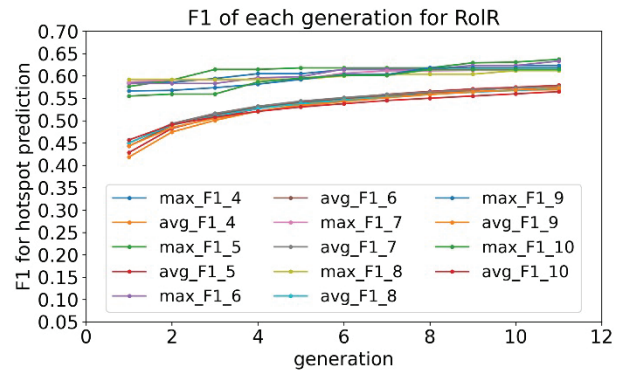

Supplement: supp [file elife-79932-supp-v1.zip]

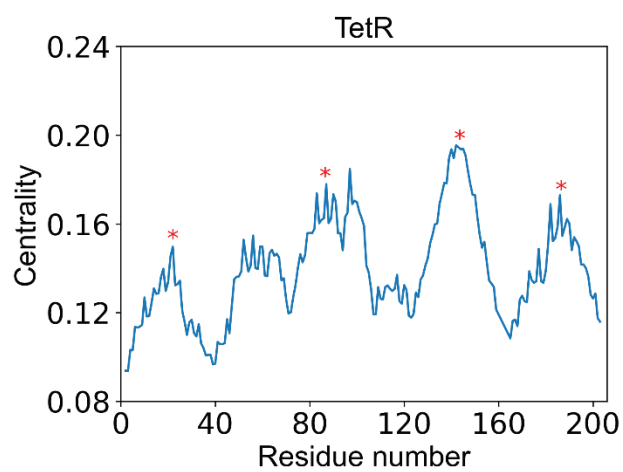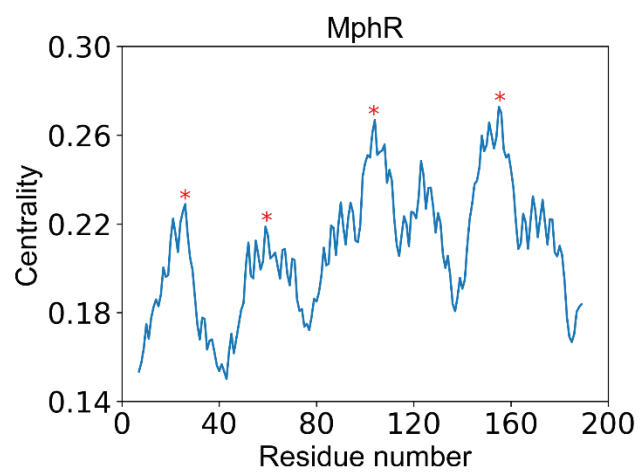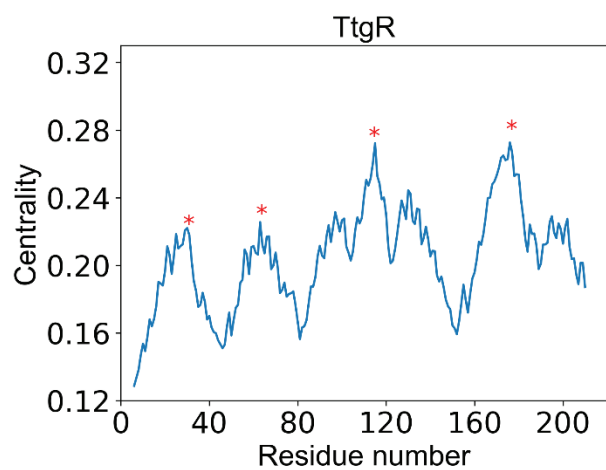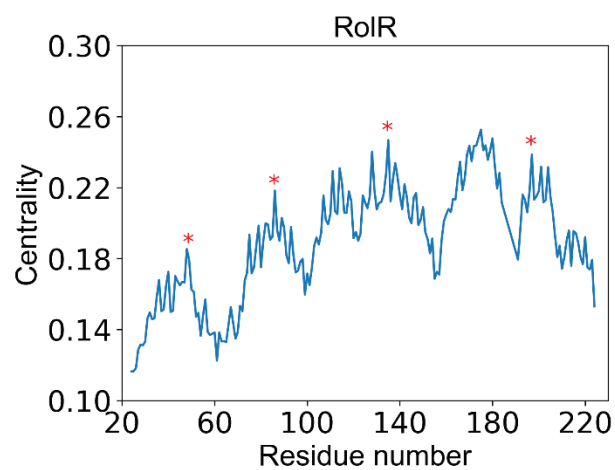

Supplement: supp [file elife-79932-supp-v1.zip]

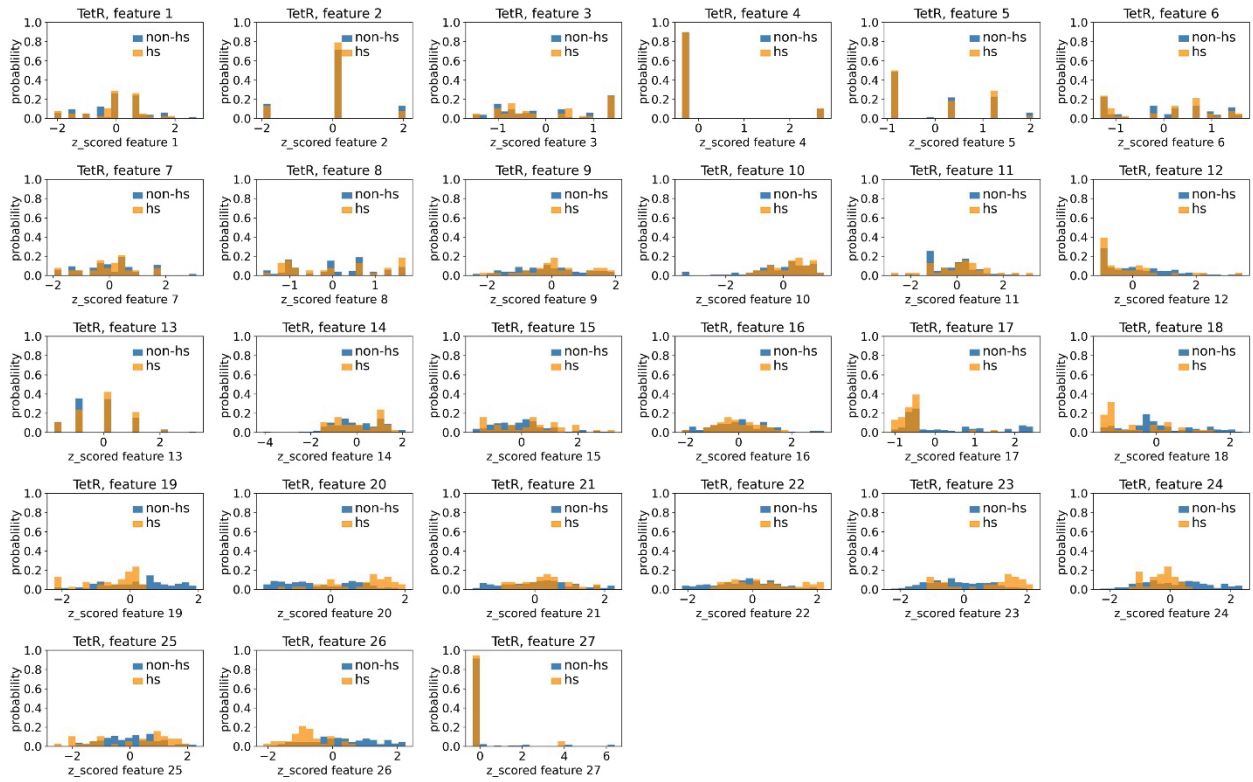

Supplement: supp [file elife-79932-supp-v1.zip]

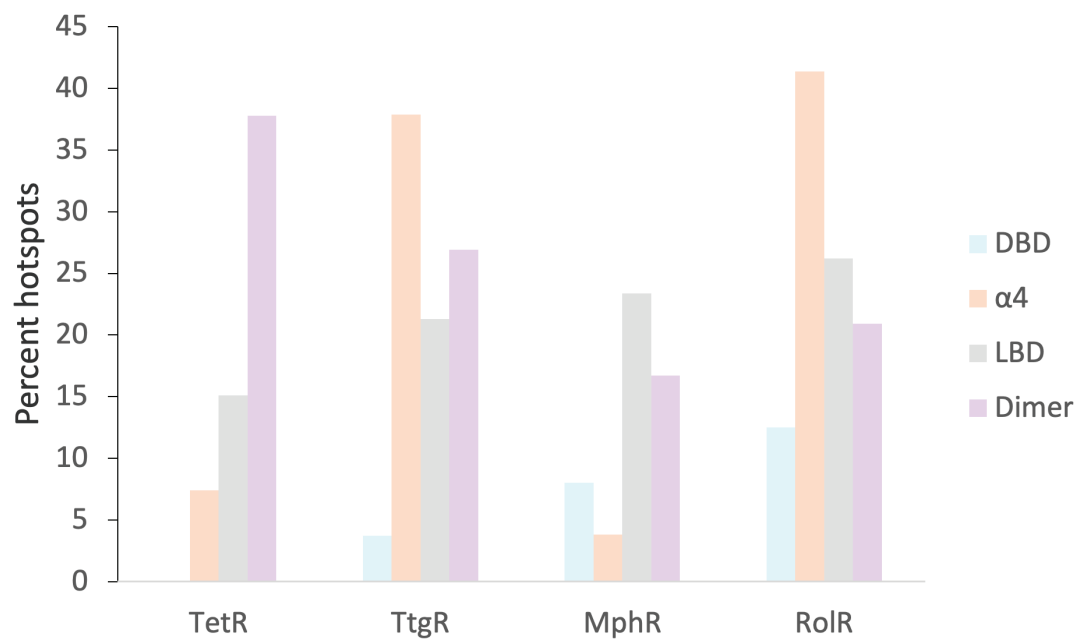

Supplement: supp [file elife-79932-supp-v1.zip]

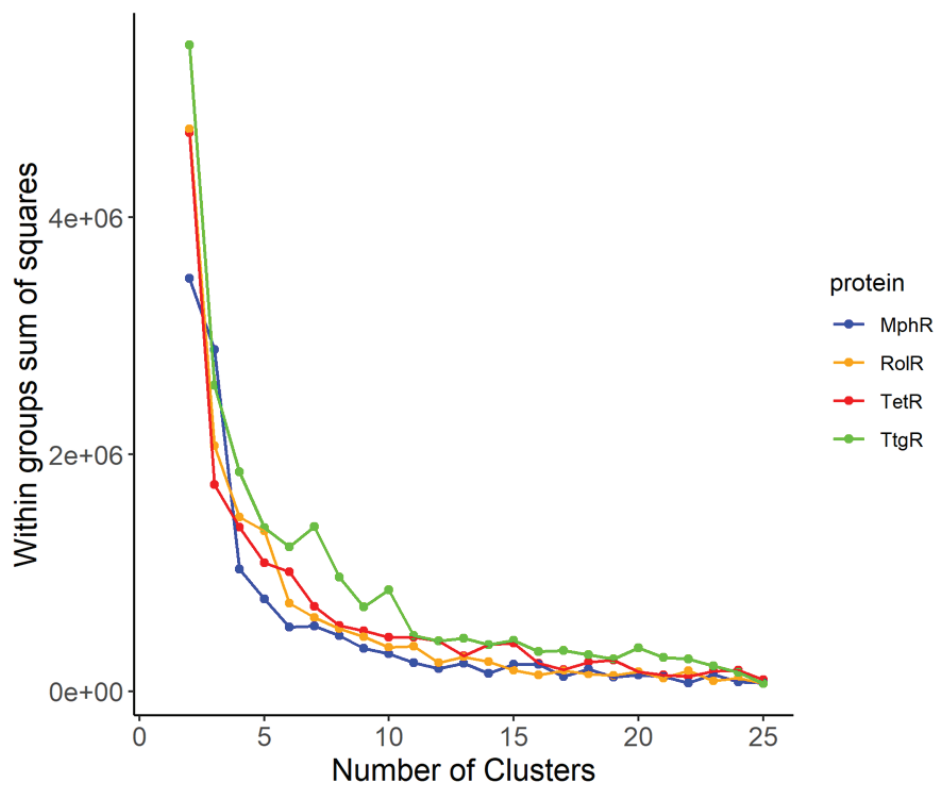

Supplement: supp [file elife-79932-supp-v1.zip]

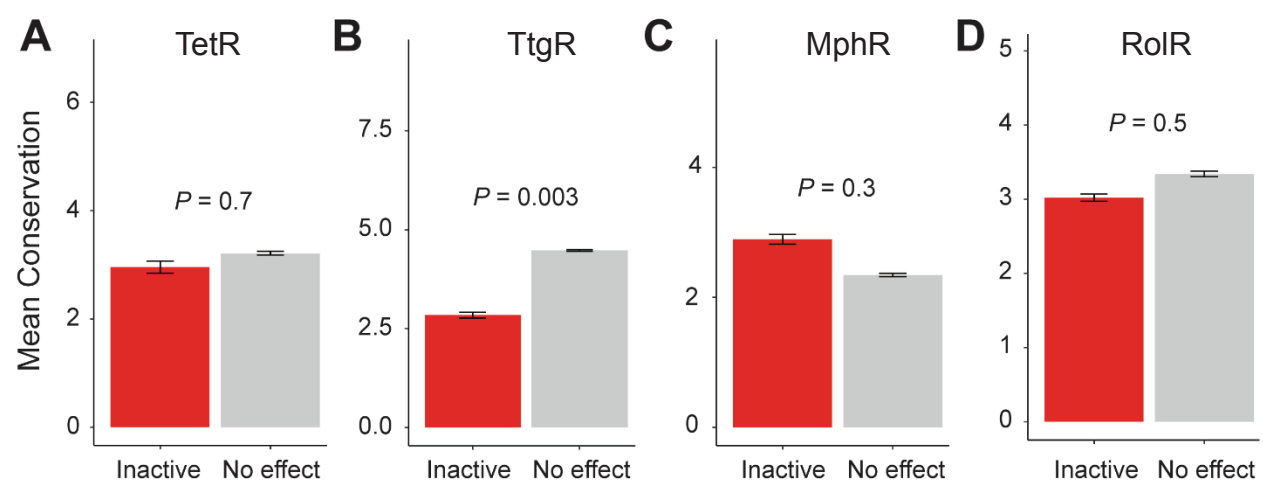

Supplement: supp [file elife-79932-supp-v1.zip]

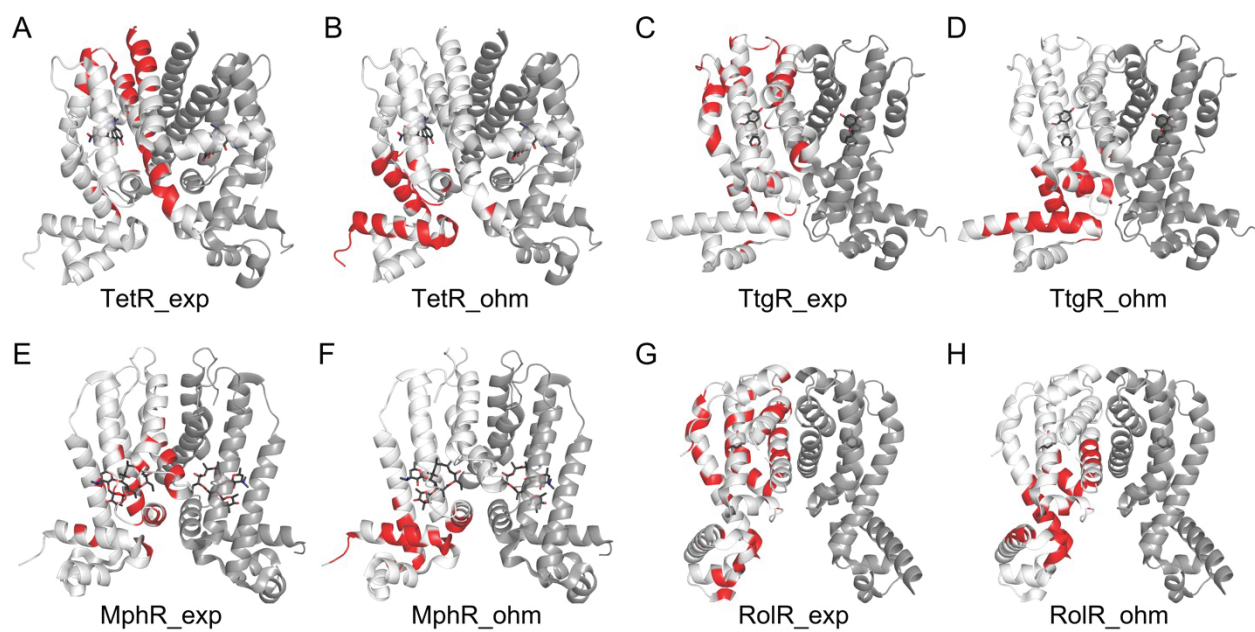

Supplement: supp [file elife-79932-supp-v1.zip]

# single-mutant homolog libraries

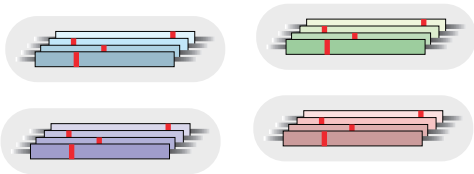

+inducer

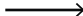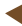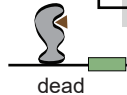

count

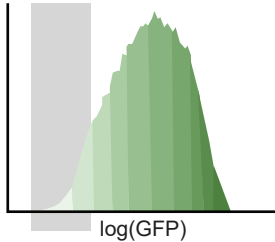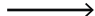

next generation sequencing

Supplement: supp [file elife-79932-supp-v1.zip]

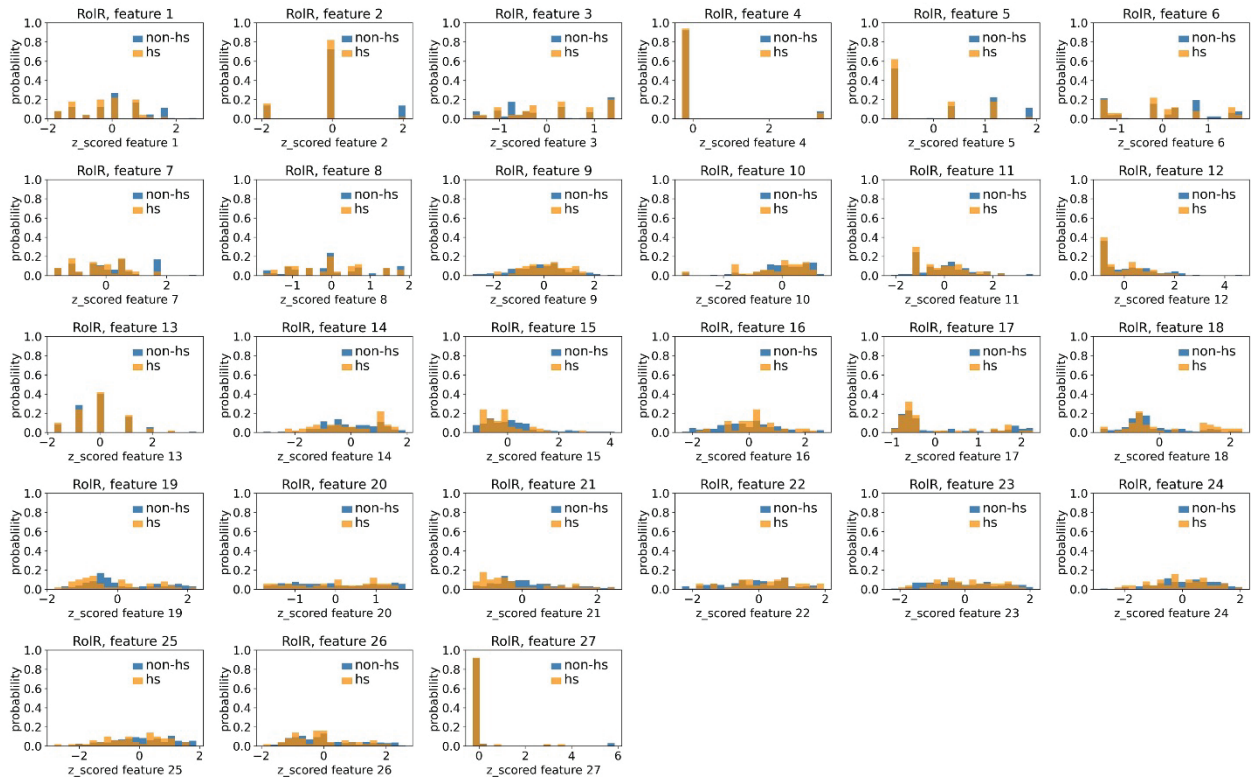

Supplement: supp [file elife-79932-supp-v1.zip]

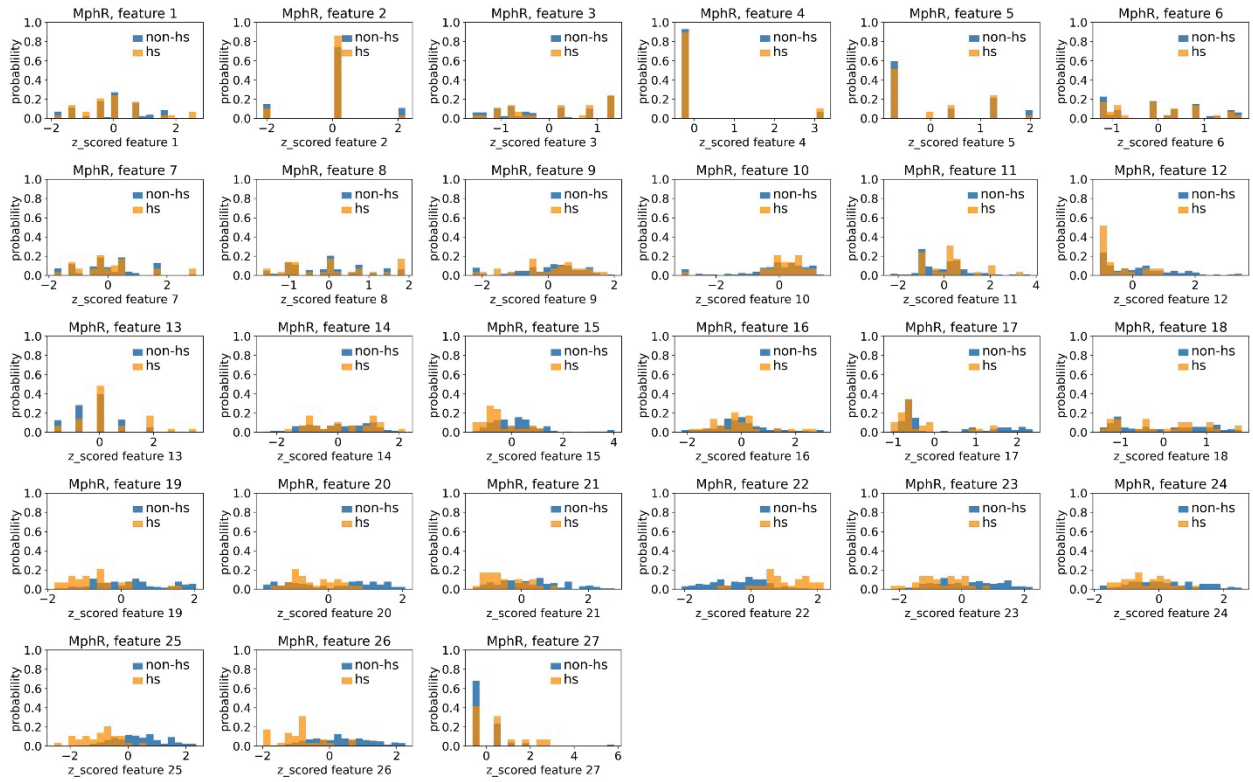

Supplement: supp [file elife-79932-supp-v1.zip]

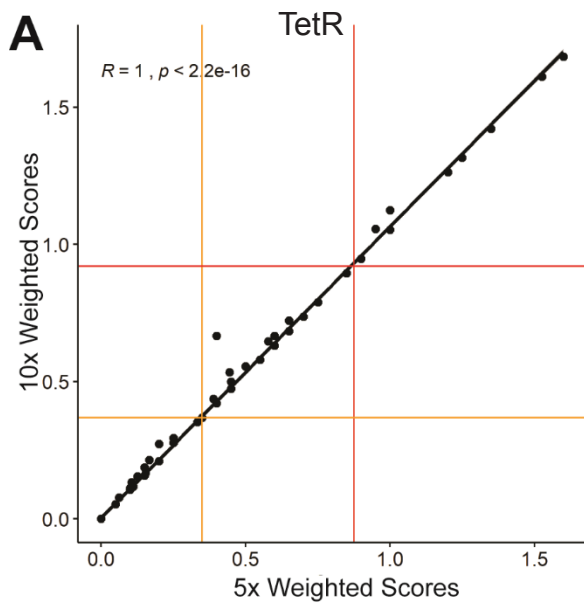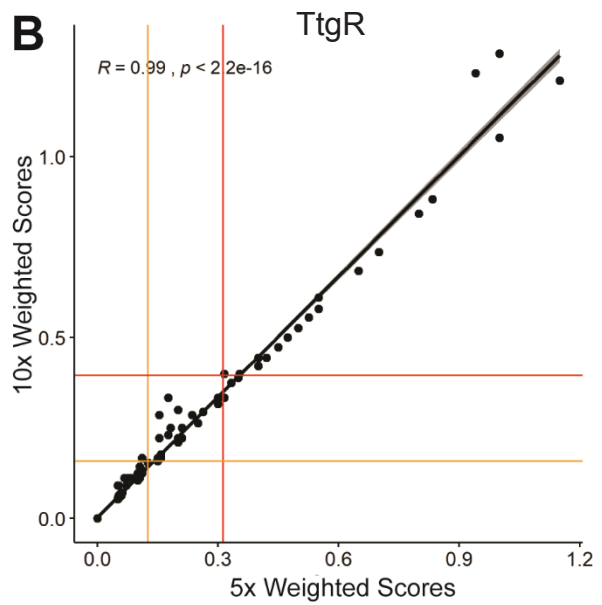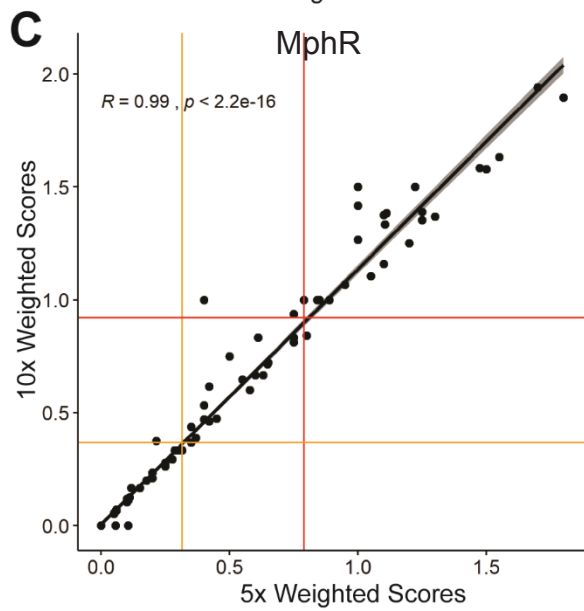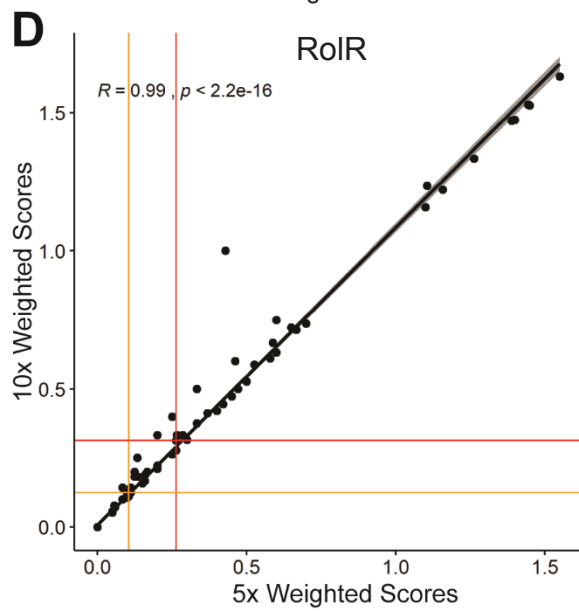

Supplement: supp [file elife-79932-supp-v1.zip]

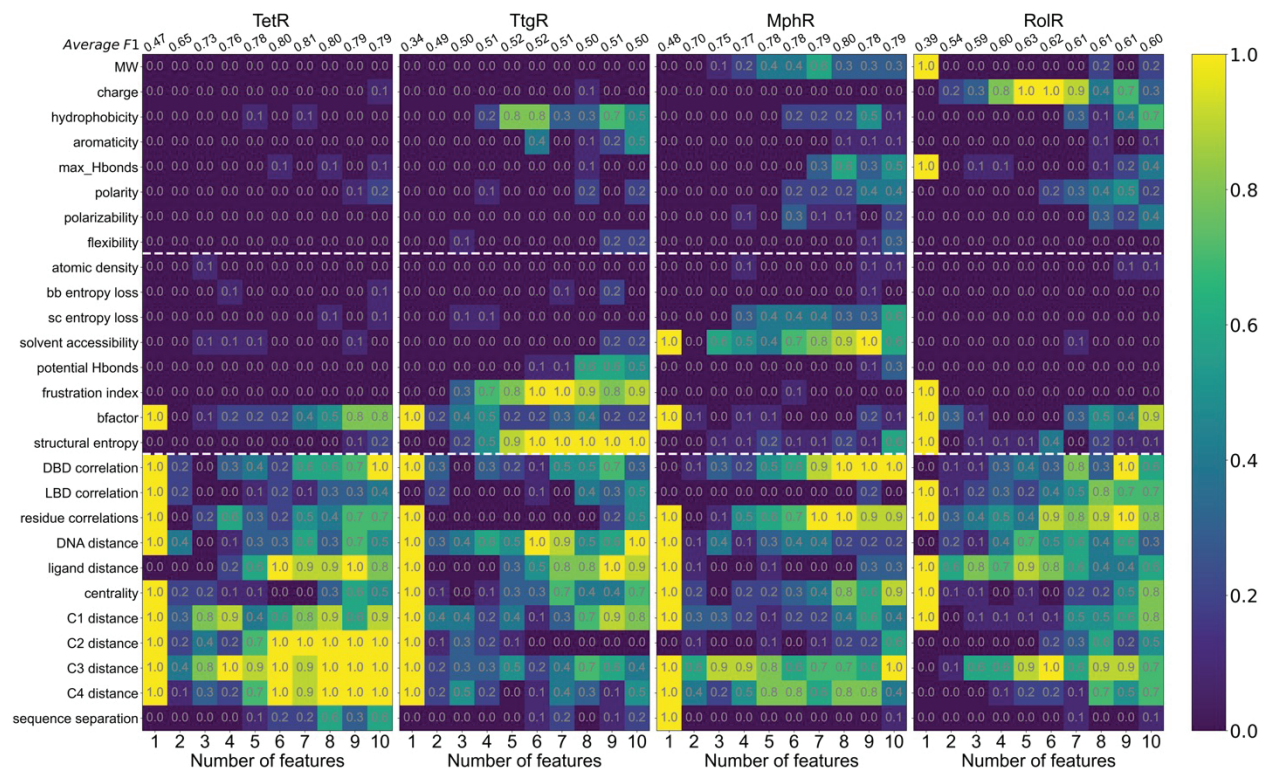

Supplement: supp [file elife-79932-supp-v1.zip]

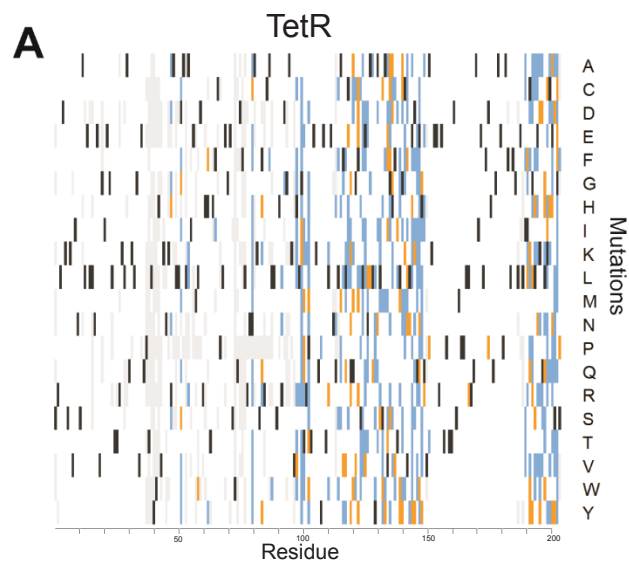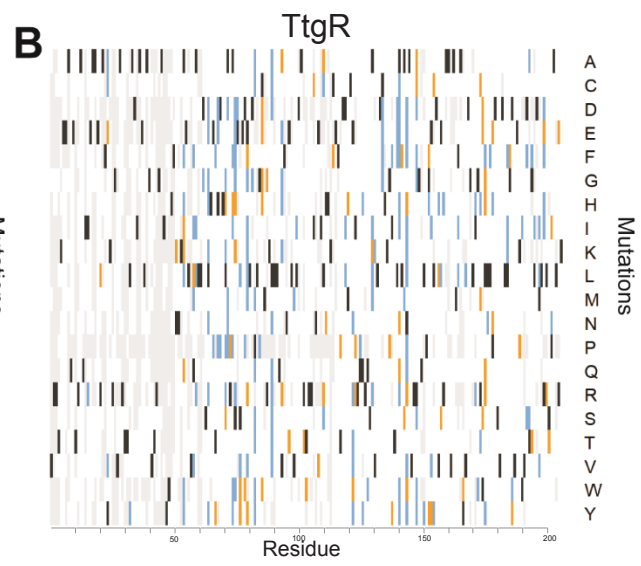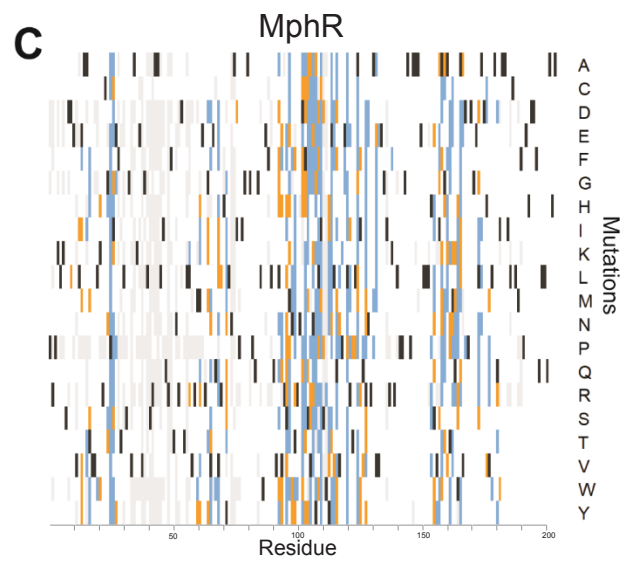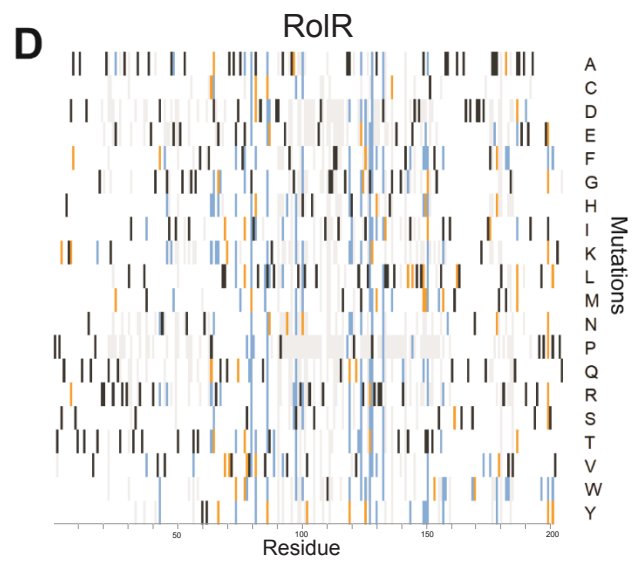

Supplement: supp [file elife-79932-supp-v1.zip]

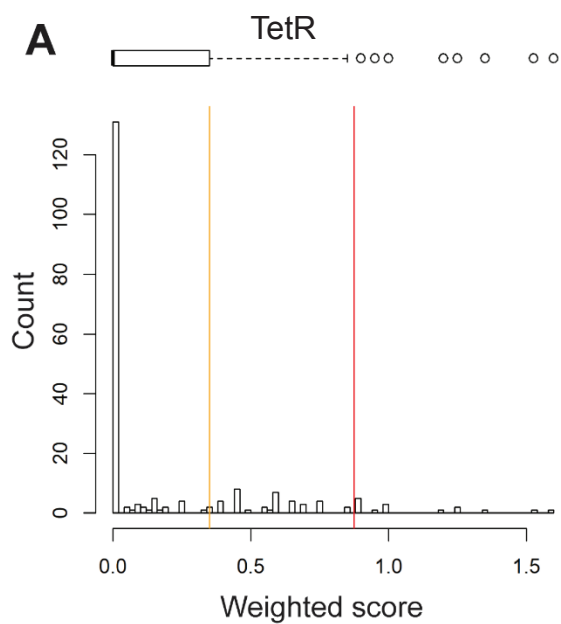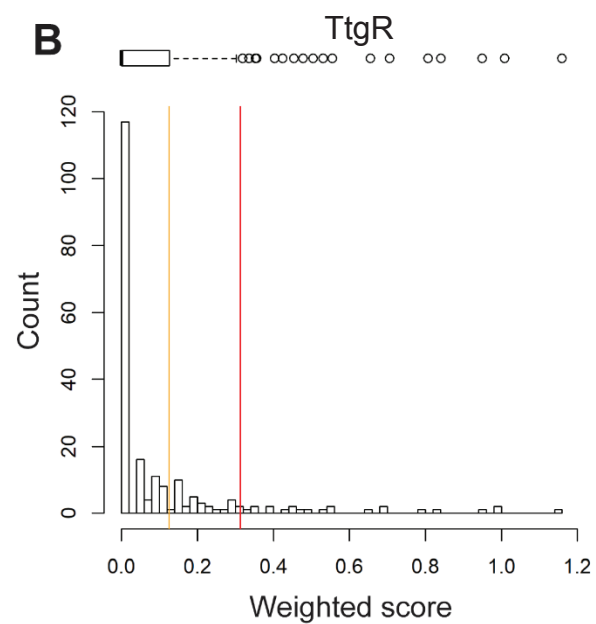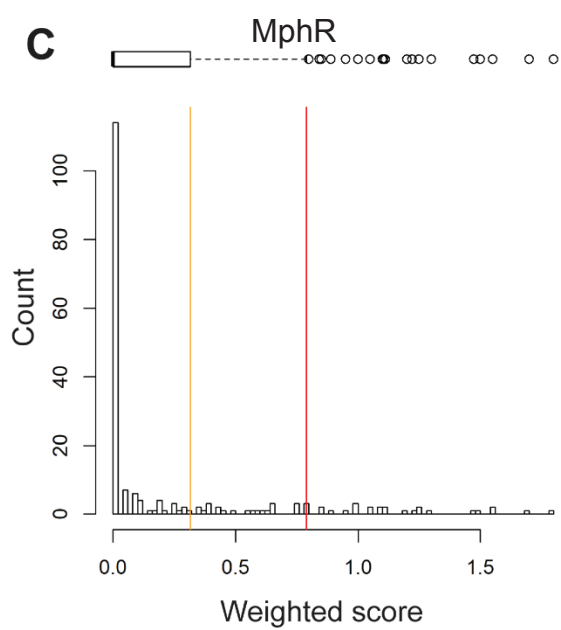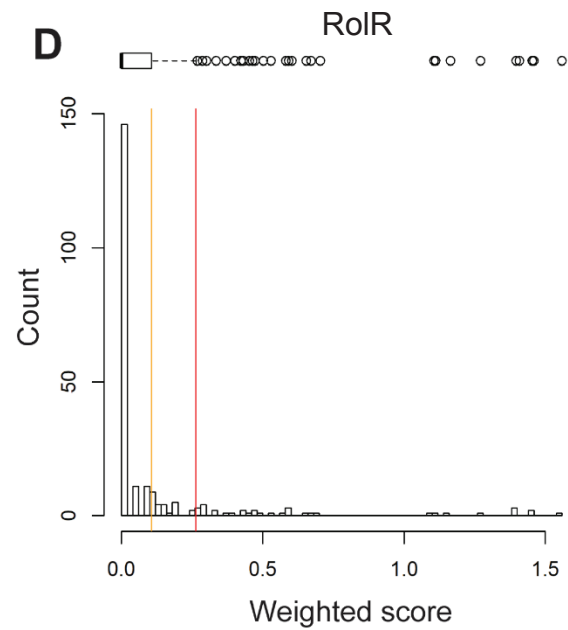

Supplement: supp [file elife-79932-supp-v1.zip]

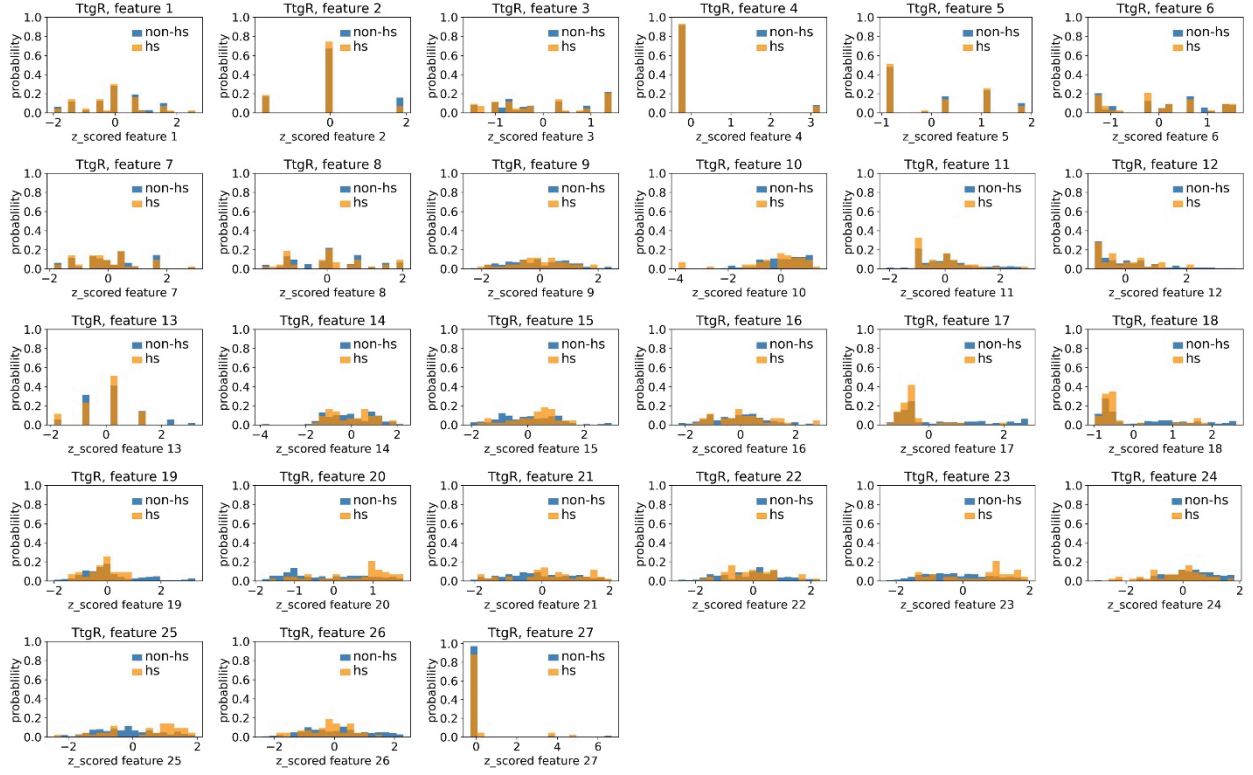

Supplement: supp [file elife-79932-supp-v1.zip]

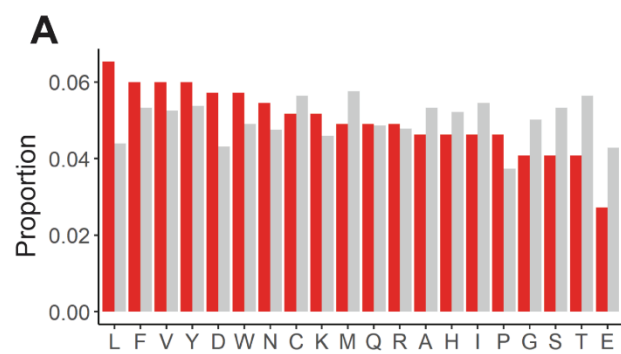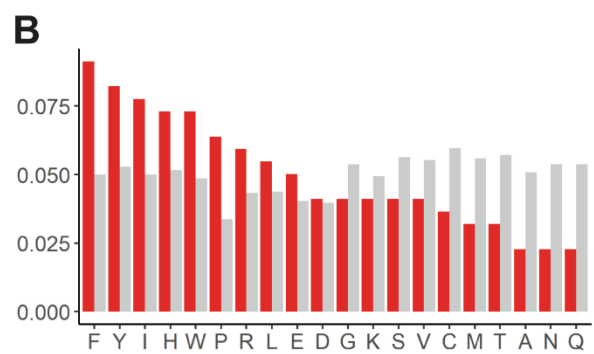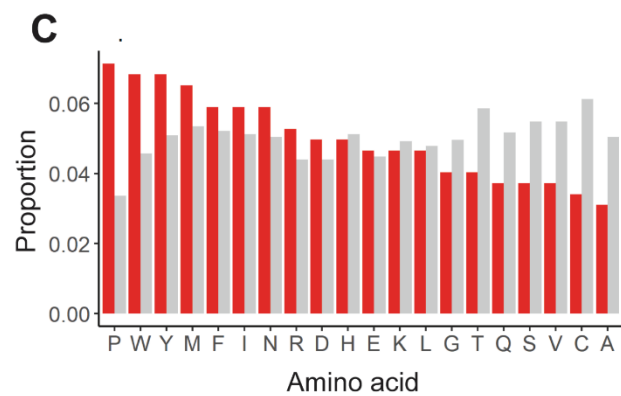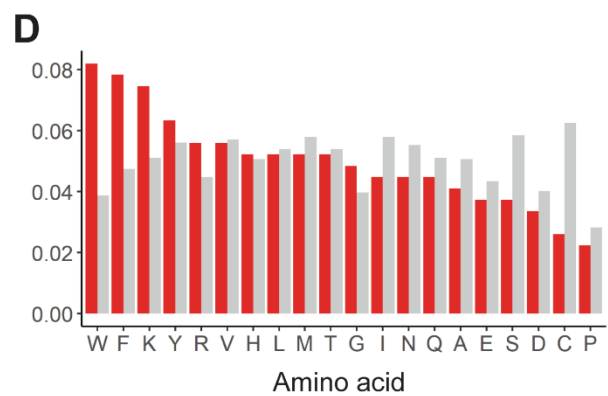

Supplement: supp [file elife-79932-supp-v1.zip]
